## RESEARCH ARTICLE

# Frameworks for measuring population health: A scoping review

Sze Ling Chan <sup>1,2\*</sup>, Clement Zhong Hao Ho<sup>3</sup>, Nang Ei Ei Khaing<sup>4</sup>, Ezra Ho <sup>4</sup>, Candelyn Pong <sup>1,2</sup>, Jia Sheng Guan <sup>5</sup>, Calida Chua<sup>6</sup>, Zongbin Li<sup>7</sup>, Trudi Lim<sup>8</sup>, Sean Shao Wei Lam <sup>1,2</sup>, Lian Leng Low<sup>2,3,9,10,11</sup>, Choon How How<sup>11,12</sup>

**1** Health Services Research Centre, SingHealth, Singapore, Singapore, **2** Health Services and Systems Research, Duke-NUS Medical School, Singapore, Singapore, **3** Centre for Population Health Research and Implementation, SingHealth Regional Health System, Singapore, Singapore, **4** Health Services Research, Changi General Hospital, Singapore, Singapore, **5** School of Biological Sciences, Nanyang Technological University, Singapore, Singapore, **6** Care and Health Integration, Changi General Hospital, Singapore, Singapore, **7** Preventive Medicine Residency, National University Health System, Singapore, Singapore, **8** School of Computing and Information Systems, Singapore Management University, Singapore, Singapore, **9** Post-Acute and Continuing Care, Outram Community Hospital, Singapore, Singapore, **10** Department of Family Medicine and Continuing Care, Singapore General Hospital, Singapore, Singapore, **11** SingHealth Duke-NUS Family Medicine Academic Clinical Program, Singapore, Singapore, **12** SingHealth Office of Regional Health, Changi General Hospital, Singapore, Singapore

\* [chan.sze.ling@singhealth.com.sg](mailto:chan.sze.ling@singhealth.com.sg)

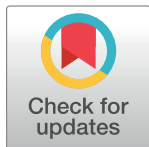

## OPEN ACCESS

**Citation:** Chan SL, Ho CZH, Khaing NEE, Ho E, Pong C, Guan JS, et al. (2024) Frameworks for measuring population health: A scoping review. PLoS ONE 19(2): e0278434. <https://doi.org/10.1371/journal.pone.0278434>

**Editor:** Angela Mendes Freitas, University of Coimbra: Universidade de Coimbra, PORTUGAL

**Received:** November 15, 2022

**Accepted:** October 3, 2023

**Published:** February 13, 2024

**Copyright:** © 2024 Chan et al. This is an open access article distributed under the terms of the [Creative Commons Attribution License](https://creativecommons.org/licenses/by/4.0/), which permits unrestricted use, distribution, and reproduction in any medium, provided the original author and source are credited.

**Data Availability Statement:** All relevant data are within the paper and [S2 File](#).

**Funding:** This research is supported by the National Medical Research Council (NMRC) through the SingHealth PULSES II Centre Grant (CG21APR1013).

**Competing interests:** The authors have declared that no competing interests exist.

## Abstract

### Introduction

Many regions in the world are using the population health approach and require a means to measure the health of their population of interest. Population health frameworks provide a theoretical grounding for conceptualization of population health and therefore a logical basis for selection of indicators. The aim of this scoping review was to provide an overview and summary of the characteristics of existing population health frameworks that have been used to conceptualize the measurement of population health.

### Methods

We used the Population, Concept and Context (PCC) framework to define eligibility criteria of frameworks. We were interested in frameworks applicable for general populations, that contained components of measurement of health with or without its antecedents and applied at the population level or used a population health approach. Eligible reports of eligible frameworks should include at least domains and subdomains, purpose, or indicators. We searched 5 databases (Pubmed, EMBASE, Web of Science, NYAM Grey Literature Report, and OpenGrey), governmental and organizational sites on Google and websites of selected organizations using keywords from the PCC framework. Characteristics of the frameworks were summarized descriptively and narratively.

### Results

Fifty-seven frameworks were included. The majority originated from the US (46%), Europe (23%) and Canada (19%). Apart from 1 framework developed for rural populations and 2 for

indigenous populations, the rest were for general urban populations. The numbers of domains, subdomains and indicators were highly variable. Health status and social determinants of health were the most common domains across all frameworks. Different frameworks had different priorities and therefore focus on different domains.

## Conclusion

Key domains common across frameworks other than health status were social determinants of health, health behaviours and healthcare system performance. The results in this review serve as a useful resource for governments and healthcare organizations for informing their population health measurement efforts.

## Introduction

Population health has become an increasingly prominent concept in public health discourse, governance, and research in recent years. In their seminal paper, Kindig and Stoddart defines population health as an approach to understanding health that transcends the individual, focusing on interrelated factors and conditions shaping the health of a population. These includes the environment, social and cultural forces, lifestyle choices and government policies [1]. In other words, health cannot be fully understood without a contextualisation of socioeconomic and other factors, such as lifestyle, that are shaped by environments and communities [2]. This change in focus and understanding of health originated during the 1970s-80s in response to the growing body of evidence on social determinants of health, and increasing advocacy for social justice and equity [3]. In contrast to the traditional biomedical model that focused on individual risk factors of diseases, such as obesity, alcohol consumption or family history, a population health approach adopts an upstream preventive approach by addressing root causes, rather than symptoms, to achieve health outcomes.

Population health indicators provide a means for government agencies and Non-Governmental Organisations (NGO) to monitor public health, evaluate interventions, and guide population health policies. Summary measures such as life-expectancy are commonly used to measure the health of a population and for benchmarking against others but are limited on their own, as they do not provide information on other aspects of health [4]. With health and its antecedents being complex and multifaceted constructs, so is the selection of relevant population health indicators. In a scoping review of population health indices, only 7 out of 27 indices had a theoretical or conceptual foundation guiding the aggregation of indicators in a meaningful way [5].

A framework should therefore precede indicator selection [4]. Frameworks provide a structure by which to organise the dynamic and interrelated factors between individuals and their environment, and through which to develop hypotheses about how such relationships affect health outcomes over time [6]. For instance, the widely accepted Canadian Institutes of Health Research population health framework provides an integrated view of health through upstream forces (a whole spectrum of cultural, economic, social and other forces), proximal causes of health (such as physiological risk factors), lifespan processes, disparities across sub-populations, health services, and health outcomes, as well as the indicators and indices used to measure them [7]. Others may differ depending on their purpose and definition of health and population health.

The usage of a population health framework is necessary as it provides a theoretical grounding and context for selection of indicators and clarifies the role of each indicator [5]. Indeed, this is a step many government agencies and NGOs have taken in their population health efforts. There have been reviews on population health indicators [5, 7, 8]. However, to our knowledge there is no work that organises and clarifies this growing body of literature.

In this paper, we conducted a scoping review with the aim of providing an overview and summary of the characteristics of existing population health frameworks that have been used to conceptualize the measurement of population health. Specific aims were to understand what domains were included in the frameworks, how or why they were chosen, and what some representative indicators under each domain were.

## Methods

This scoping review follows the guidelines described by the Preferred Reporting Items for Systematic reviews and Meta-Analyses extension for Scoping Reviews (PRISMA-ScR) checklist, a minimum set of items for reporting of scoping reviews to promote transparent reporting of scoping reviews [9] (S1 File).

## Eligibility criteria

The eligibility criteria of *population health frameworks* were guided by the elements of the Population, Concept, and Context (PCC) framework. In the population element, we were interested in frameworks that were applied to general populations, which included subsets by demographic variables (e.g. age or ethnicity). However, we excluded populations which were defined by illnesses or diseases (e.g. stroke or mental health patients), or institutional settings (e.g. workplace, schools).

For the Concept element, frameworks should contain components of measurement of health, with or without its antecedents. Frameworks by definition convey structure, at least in the form of categorization [6]. Therefore, eligible frameworks should fulfil this definition. Simple lists of indicators without categories are excluded. Frameworks should also be novel, so mere representations of known literature or frameworks with insufficient explanation, and logic models for specific programs were excluded. For context, frameworks should be applied at the macrolevel, or use a population health approach.

Eligible *reports* of eligible frameworks would need to include at least one of the following dimensions— 1) Domains and subdomains; 2) purpose of the framework; or 3) population health indicators used. Where there were more than 1 report for the same framework, we selected the one with the most relevant and comprehensive information. If another report supplemented information not found in this primary report, we would include both. We included primary articles of any study design, reviews and selected grey literature. Conference abstracts, theses and dissertations, letters to editors, commentaries, non-English articles, and articles published before 1990 were excluded.

## Information sources

We searched MEDLINE (PubMed), EMBASE, Web of Science, NYAM Grey Literature Report and OpenGrey databases. In addition, we searched governmental and organizational sites on Google (site:.gov OR site:.org OR site:.net OR site:.eu) and websites of the following government agencies and NGOs known to have population health initiatives and/or frameworks:

- UK National Health Service (NHS)
- Agency for Healthcare Research and Quality (AHRQ)

- Centres for Disease Control (CDC)
- US Department of Health and Human Services
- Public Health Agency of Canada
- Australian Government Department of Health
- World Health Organization (WHO)
- Organisation for Economic Co-operation and Development (OECD)
- Public Health England
- European Union (EU) CDC
- National Quality Forum (NQF)
- Health Information Technology, Evaluation, and Quality Center (HITEQ)
- The King's Fund
- Africa Population and Health Research Centre
- Canterbury District Health Board

### Search strategy

We used the keywords 'framework' and 'population health' from the concept and context elements as search terms, respectively. Depending on the database, we used these terms as keywords or also included controlled vocabulary that corresponded to them. The keywords or controlled vocabulary were combined using the BOOLEAN operator 'OR' and 'AND' within and across the PCC elements, respectively. The search terms are given in [S2 File](#). Where possible, filters were applied to select only human studies and English articles. The search of the databases was performed from 1 Jan 1990 to 5 May 2023. For some databases (Pubmed, EMBASE, Web of Science) we further applied a 'title/abstract' filter to improve the specificity of the search results. If we came across reports that mention an eligible framework but did not contain the relevant details to be included, we then searched for reports on that particular framework. We also searched reference lists of included reports.

### Selection of sources of evidence

Three reviewers (SLC, CZHH, NEEK) developed and piloted the search strategy. Two stages of screenings were performed to select the sources of evidence. At the first stage, the titles and abstracts of each source was screened and selected for full text review by two reviewers independently. In the second stage, the full texts of articles selected in the first stage were also reviewed by 2 reviewers independently. In both stages, a third reviewer would make the final decision in the event of a conflict.

### Data charting process

A data charting form to extract data of interest was developed by one reviewer (SLC) and piloted by another (CZHH). Data from each report was extracted by one reviewer and reviewed by a second reviewer. Any discrepancies were resolved by consensus between the data extractor and reviewer.

## Data items

The data items included citation details, details on the framework (e.g. name, country of origin, organization that developed it, type of population it is applicable to, approach to development, dimensions in framework apart from domains, if framework assessed indicators by certain cross-cutting variables such as life stages, socioeconomic factors, and/or health-related sectors), and the domains and indicators used in the framework, including definitions or descriptions where available. For domains, we recorded up to 2 further levels of sub-domains (total 3 levels).

## Synthesis of results

To facilitate summary and presentation of results, some variables were reduced to a smaller number of categories manually by a single reviewer (SLC). These variables were the type of organization developing the frameworks, types of population the framework was applicable to, and dimensions of the framework. Types of organizations were broadly categorized into governmental, academic, non-government organizations, non-profit organizations, intergovernmental organizations, and private foundations. Populations were grouped into general, rural and indigenous populations. Finally, dimensions cut across domains and indicators and we focused mainly on a lifespan, health equity and sector approach. For the lifespan approach, this generally involve diving into indicators relevant for different life stages and/or breaking down indicators by age groups. For the equity approach this typically involves examining indicators by certain socioeconomic factors, such as education level, income, and ethnicity. For the sector approach, this involves looking at indicators specific for different health-related sectors such as clinical care, public health, and community and social services. We categorized frameworks under 'dimensions' into lifespan, equity and/or other specific dimensions mentioned.

The characteristics of the frameworks were then summarized descriptively using counts and proportions, and median and ranges, as appropriate. Domains were aggregated by concept using hierarchical clustering and manual refinement for purposes of visualization. The final clustering was agreed on by 3 reviewers (SLC, CP, JSG). The domain concepts, and number of domains, subdomains and indicators were visualized using a word cloud and heatmap, respectively. Other aspects of the frameworks were summarized narratively.

## Results

### Search results

A total of 57 population health frameworks were included in this review (Fig 1). The characteristics of the frameworks and their details are shown in Tables 1 and 2, respectively. The full list of the domains, subdomains and indicators are provided in S3 File.

### Characteristics of population health frameworks

Majority of the frameworks originated from the US (45.6%), Europe (22.8%) and Canada (19.3%). None were from Asia. Most were published between 2001 and 2020 (64.9%). Governmental (including intergovernmental) and academic organizations accounted for majority of framework development (84.2%). Only three frameworks were developed for specific populations (2 for indigenous and 1 for rural), while the rest were for the general or urban population. Two-thirds of the frameworks mentioned some dimension, and these were slightly more frameworks using the lifespan approach compared to the equity approach (29.8% vs. 21.1%).

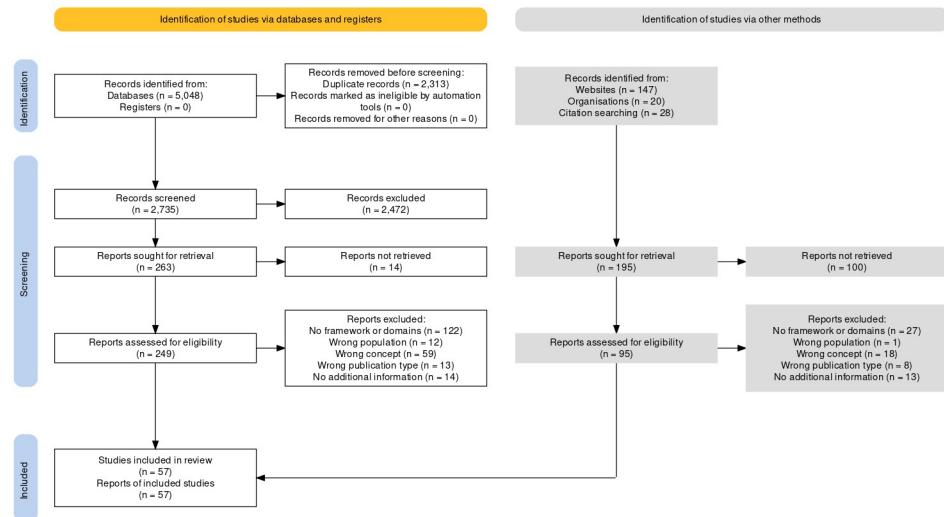

**Fig 1. PRISMA diagram.** The PRISMA diagram shows the numbers of reports retrieved from various sources and flow through the stages of the scoping review. A total of 57 reports were included in this review. The diagram was generated using an open source R shiny app [10].

<https://doi.org/10.1371/journal.pone.0278434.g001>

## Domains and subdomains

Majority of the frameworks have between 1 to 5 domains (70.2%) but have more level 2 subdomains (26.3% have 6–10, 29.8% have 11–20 and 19.3% have >20). The median number of domains and level 2 subdomains are 4 (range 2–16) and 10 (range 0–65), respectively (S1 Fig). Half of the frameworks do not have level 3 subdomains. Of those that do, most have >10 (72.4%). The median number of indicators is 18 (range 0–255). Twenty-six frameworks did not have indicators (45.6%). Of those that do, majority have >20 indicators (83.9%).

The most common concepts were health, (social) determinants of health, healthcare system and health behaviours (S2 Fig). The myriad of domains has gradually accumulated over the years. In frameworks published before 2000, health was the key domain, social determinants of health emerged in the next 2 decades (2001–2020) followed by healthcare system, health behaviours, functional limitations and activities of daily living in the recent frameworks (S3 Fig).

For health, most frameworks used summary indicators of health such as mortality and life-expectancy, and indicators of a few selected health conditions. However, four frameworks had longer lists of indicators for specific communicable and non-communicable diseases [12, 26, 27, 43, 50]. Of note, psychological or mental health risk factors and/or outcomes feature in 31 (54%) of the frameworks, highlighting its emerging importance [12, 17–19, 22, 25–30, 32–35, 38, 39, 41–46, 48–50, 54, 56, 58, 59, 62].

Social determinants of health, which encompasses the full set of social conditions in which people live and work [66], were present under some label or other in all except 7 frameworks [16, 34, 42, 50, 52, 54, 60]. Some of the frameworks elaborate on these factors, with subdomains and indicators on the physical environment, social environment, and even politics, national and global trends [12, 21–23, 26, 29, 35, 43, 53, 55–59, 63, 64, 67]. For example, the conceptual framework for urban health measures sub-domains such as immigration, globalization and the changing role of government [21]. The framework for community contextual characteristics, one of the two frameworks with the largest number of indicators, also measures

**Table 1. Summary of key characteristics of included frameworks.**

| Characteristics                                          | N (%)*    |
|----------------------------------------------------------|-----------|
| Year of publication                                      |           |
| 2000 and before                                          | 6 (10.5)  |
| 2001 to 2010                                             | 15 (26.3) |
| 2011 to 2020                                             | 22 (38.6) |
| 2020 onwards                                             | 14 (24.6) |
| Country/region of origin                                 |           |
| US                                                       | 26 (45.6) |
| Europe                                                   | 13 (22.8) |
| Canada                                                   | 11 (19.3) |
| Australia/New Zealand                                    | 3 (5.3)   |
| International                                            | 2 (3.5)   |
| US and Western Europe                                    | 1 (1.8)   |
| Ghana                                                    | 1 (1.8)   |
| Type of organization framework originated from           |           |
| Governmental                                             | 23 (40.4) |
| Academic                                                 | 16 (28.1) |
| Non-profit organization                                  | 8 (14.0)  |
| Intergovernmental                                        | 4 (7.0)   |
| Governmental/academic                                    | 3 (5.3)   |
| Governmental/non-profit organisation                     | 1 (1.8)   |
| Intergovernmental/academic/non-governmental organisation | 1 (1.8)   |
| Private foundation                                       | 1 (1.8)   |
| Population framework is applied to                       |           |
| General/urban                                            | 54 (94.7) |
| Indigenous                                               | 2 (3.5)   |
| Rural                                                    | 1 (1.8)   |
| Dimensions                                               |           |
| None                                                     | 19 (33.3) |
| Lifespan                                                 | 17 (29.8) |
| Equity                                                   | 12 (21.1) |
| Lifespan and equity                                      | 8 (14.0)  |
| Sector                                                   | 1 (1.8)   |

\*Percentages may not add up to 100% due to rounding

<https://doi.org/10.1371/journal.pone.0278434.t001>

the economic, employment, education, political, environmental, housing, governmental, transport aspects in the region where the population of interest is located [29]. Interestingly, crime and violence features in 16 frameworks, as this affects the physical safety of people in a community [12, 15, 26, 29, 30, 33, 41, 43–45, 53, 56, 59, 62, 63, 67]. Many frameworks also measure lifestyle and health-related behaviours. Apart from the common ones like diet, physical activity, smoking and alcohol use, some frameworks include sexual behaviour, use of illicit drugs, seatbelt behaviour, immunization or health screening, breastfeeding and induced abortion [12, 15, 27–30, 32, 33, 39, 45, 55, 58, 59, 62]. One even included measures of parenting practices [43].

Almost a third (31.6%) of the frameworks have domains that pertain to the healthcare system or healthcare performance. One example is the OECD framework, which assesses health

Table 2. Details of included frameworks.

| Ref / Year of publication                 | Framework name                                                                                                                           | Country/region of origin | Name of organization that developed it (Type of organization)                                              | Population    | Dimensions <sup>†</sup> |
|-------------------------------------------|------------------------------------------------------------------------------------------------------------------------------------------|--------------------------|------------------------------------------------------------------------------------------------------------|---------------|-------------------------|
| Arah 2005 [11]                            | Canadian Health Indicators Framework (modified)                                                                                          | Canada                   | Canadian Government (Gov)                                                                                  | General/Urban | Equity                  |
| Azzopardi 2018 [12]                       | Reporting framework for Indigenous adolescents in Australia                                                                              | Australia                | University of Melbourne, Murdoch children's research institute (Acad)                                      | Indigenous    |                         |
| Beard 2009 [13]                           | Framework for considering the influence of socioeconomic and cultural factors on health                                                  | Australia                | Northern Rivers University Department of Rural Health (Acad)                                               | Rural         |                         |
| Casebeer 1999 [14]                        | Health indicators framework                                                                                                              | Canada                   | Collaborative initiative of the Alberta Heritage foundation for medical research and Alberta Health (Acad) | General/Urban |                         |
| CDC 2013 [15]                             | A Schematic Framework for Population Health Planning                                                                                     | US                       | U.S. Department of Health and Human Services & Centres for Disease Control and Prevention (Gov)            | General/Urban |                         |
| CHS 2021 [16]                             | System Level Measures (SLMs) Framework                                                                                                   | New Zealand              | Canterbury Health System                                                                                   | General/Urban | Lifespan, equity        |
| CIHI 2013 [17]                            | Canadian Institute for Health Information (CIHI)'s New Health System Performance Measurement Framework                                   | Canada                   | CIHI (NPO)                                                                                                 | General/Urban | Equity                  |
| Emeny 2022 [18]                           | Precision Health Framework                                                                                                               | US                       | University of New Mexico                                                                                   | General/Urban |                         |
| Etches 2006 [7]                           | Canadian Institutes of Health Research (CIHR)—Institute of Population and Public Health (IPPH) conceptual framework of population health | Canada                   | CIHR and IPPH (Gov)                                                                                        | General/Urban |                         |
| EU 2015 [19]                              | Joint Assessment Framework                                                                                                               | Europe                   | European Union (EU)/European Commission (Inter-Gov)                                                        | General/Urban | Lifespan, equity        |
| Evans 1990 [20]                           | Evans and Stoddart                                                                                                                       | Canada                   | University of British Columbia, McMaster University (Acad)                                                 | General/Urban |                         |
| Galea 2005 [21]                           | Conceptual framework for urban health                                                                                                    | US                       | Center for Urban Epidemiologic Studies, New York Academy of Medicine (Acad)                                | General/Urban | Equity                  |
| Halfon 2002 [22]                          | Life course health development framework                                                                                                 | US                       | National centre for Infancy and early childhood health policy (Gov)                                        | General/Urban | Lifespan                |
| Hancock 1999 [23]                         | Basic Framework for indicators                                                                                                           | Canada                   | Knowledge Development Division, Health Canada (Gov)                                                        | General/Urban | Equity                  |
| Hatef 2018 [24]                           | Maryland                                                                                                                                 | US                       | Maryland Department of Health (Gov)                                                                        | General/Urban | Lifespan                |
| Health Canada 1994 [25]                   | Framework for action on population health                                                                                                | Canada                   | Federal/provincial/territorial advisory committee on population health (Gov)                               | General/Urban |                         |
| Health Policy Institute of Ohio 2016 [26] | Ohio Health Priorities                                                                                                                   | US                       | Ohio Governor's Office of Health Transformation, Ohio Department of Health and Ohio Department of Medicaid | General/Urban | Lifespan                |
| Healthy Montgomery 2016 [27]              | Healthy Montgomery Core Measures Set                                                                                                     | US                       | Montgomery County Department of Health and Human Services (Gov)                                            | General/Urban |                         |
| Healthy Ireland 2019 [28]                 | Healthy Ireland (HI) Outcomes Framework                                                                                                  | Ireland                  | Ireland Department of Health (Gov)                                                                         | General/Urban | Lifespan                |
| Hillemeier 2003 [29]                      | Framework for community contextual characteristics                                                                                       | US                       | The authors in collaboration with the CDC (Gov)                                                            | General/Urban |                         |
| Hood 2016 [30]                            | County Health Rankings                                                                                                                   | US                       | University of Wisconsin Population Health Institute and the Robert Wood Johnson Foundation (Acad)          | General/Urban | Lifespan, equity        |
| Inf-Act 2020 [31]                         | A Distributed Infrastructure on Population Health (DiPoH)                                                                                | Europe                   | Information for Action (InfAct) (Gov)                                                                      | General/Urban |                         |

(Continued)



Table 2. (Continued)

| Ref / Year of publication              | Framework name                                                                                                     | Country/region of origin | Name of organization that developed it (Type of organization)                                                                                                                           | Population    | Dimensions <sup>†</sup>                                            |
|----------------------------------------|--------------------------------------------------------------------------------------------------------------------|--------------------------|-----------------------------------------------------------------------------------------------------------------------------------------------------------------------------------------|---------------|--------------------------------------------------------------------|
| IOM 2009 [32]                          | Institute of Medicine (IOM)                                                                                        | US                       | National Academy of Medicine (formerly IOM until 2015) (NPO)                                                                                                                            | General/Urban | Lifespan                                                           |
| IOM 2012 [33]                          | Healthy People 2020 Leading Health Indicators (Health Outcome Logic Model)                                         | US                       | National Academy of Medicine (formerly IOM until 2015) (NPO)                                                                                                                            | General/Urban | Lifespan                                                           |
| IP3 2017 [34]                          | Vital Conditions Framework                                                                                         | US                       | Institute for People, Place, & Possibility                                                                                                                                              | General/Urban | Lifespan                                                           |
| Ireland Department of Health 2021 [34] | Health System Performance Assessment (HSPA) Framework                                                              | UK                       | Ireland Department of Health                                                                                                                                                            | General/Urban | Lifespan/equity                                                    |
| Jeffery 2006 [35]                      | Box framework for population health indicators                                                                     | Canada                   | The authors in collaboration with the Inuit Tapiriit Kanatami, Prince Albert Grand Council (PAGC) and Athabasca Health Authority (AHA) (Gov/(NPO))                                      | Indigenous    |                                                                    |
| Juarez 2014 [36]                       | Public Health Exposome Conceptual Model                                                                            | US                       | University of Tennessee Health Science Center (Acad)                                                                                                                                    | General/Urban | Lifespan, equity                                                   |
| Kassler 2017 [37]                      | Centers for Medicare & Medicaid Services (CMS)                                                                     | US                       | CMS (Gov)                                                                                                                                                                               | General/Urban | Sector (clinical care, public health, community & social services) |
| Kim 2013 [38]                          | Social Determinants of Infant Mortality/ Birth Outcomes Conceptual Framework                                       | US and Western Europe    | RAND corporation (NPO)                                                                                                                                                                  | General/Urban | Equity                                                             |
| Kramers 2003 [39]                      | European Community Health Indicators (ECHI)                                                                        | Europe                   | European Commission (Gov)                                                                                                                                                               | General/Urban | Lifespan, equity                                                   |
| Krewski 2007 [40]                      | An integrated framework for risk management and population health                                                  | Canada                   | University of Ottawa (Acad)                                                                                                                                                             | General/Urban |                                                                    |
| Kuehnert 2021 [41]                     | Not reported                                                                                                       | US                       | American Academy of Nursing                                                                                                                                                             | General/Urban | Lifespan                                                           |
| Kumah 2020 [42]                        | Ghana's Holistic Assessment Tool                                                                                   | Ghana                    | Ghana's Ministry of Health (Gov)                                                                                                                                                        | General/Urban | Lifespan, equity                                                   |
| LA County 2017 [43]                    | Los Angeles (LA) Key indicators of health                                                                          | US                       | LA County Department of Public Health (Gov)                                                                                                                                             | General/Urban | Lifespan                                                           |
| Levene 2018 [44]                       | Leicester Systematic Exploration and Analysis of Relationships Connecting Health variables in populations (SEARCH) | UK                       | George Davies Centre for Medicine                                                                                                                                                       | General/Urban |                                                                    |
| NQF 2014 [45]                          | National Quality Forum (NQF) population health indicators                                                          | US                       | NQF (NPO)                                                                                                                                                                               | General/Urban | Lifespan                                                           |
| OECD 2021 [46]                         | Organisation for Economic Co-operation and Development (OECD) Framework for health system performance assessment   | International            | OECD (Inter-Gov)                                                                                                                                                                        | General/Urban | Lifespan                                                           |
| Oleske 2009 [47]                       | Oleske epidemiologic model for the delivery of health care services                                                | US                       | <i>Not reported</i>                                                                                                                                                                     | General/Urban |                                                                    |
| PHCPI 2022* [48]                       | Primary Healthcare Performance Initiative (PHCPI) conceptual framework                                             | International            | World Health Organization (WHO), World Bank Group, and the Bill & Melinda Gates Foundation, in partnership with Ariadne Labs and Results for Development Institute (Inter-Gov/NGO/Acad) | General/Urban | Equity                                                             |
| PHE 2021 [49]                          | Labonte model                                                                                                      | UK                       | Public Health England (PHE) (Gov)                                                                                                                                                       | General/Urban | Equity                                                             |
| Robine 2002 [50]                       | Euro-REVES 2                                                                                                       | Europe                   | Euro-REVES group (Acad)                                                                                                                                                                 | General/Urban |                                                                    |

(Continued)

Table 2. (Continued)

| Ref / Year of publication          | Framework name                                                     | Country/region of origin | Name of organization that developed it (Type of organization)                                                                             | Population    | Dimensions <sup>†</sup> |
|------------------------------------|--------------------------------------------------------------------|--------------------------|-------------------------------------------------------------------------------------------------------------------------------------------|---------------|-------------------------|
| Roos 1995 [51]                     | Population Health Information System                               | Canada                   | Manitoba Centre for Health Policy and Evaluation (Acad)                                                                                   | General/Urban | Lifespan                |
| Sadana 2002 [52]                   | WHO Multi-Country Survey                                           | Switzerland              | WHO (Inter-Gov)                                                                                                                           | General/Urban | Lifespan                |
| Santana 2020 [53]                  | EURO-HEALTHY Population Health Index model                         | Europe                   | Centre of Studies in Geography and Territorial Planning (Acad)                                                                            | General/Urban | Equity                  |
| Schoen 2006 [54]                   | National scorecard for the US health system                        | US                       | Commonwealth Fund Private foundation                                                                                                      | General/Urban | Equity                  |
| Schoon 2022 [55]                   | Holistic Health Determinants Model                                 | US                       | Minnesota State University Mankato                                                                                                        | General/Urban | Lifespan/equity         |
| Schulz 2004 [56]                   | Social Determinants of Health and Environmental Health Promotion   | US                       | School of Public Health, University of Michigan (Acad)                                                                                    | General/Urban | Equity                  |
| SDH 2020 [57]                      | Live Well San Diego equity framework                               | US                       | County of San Diego Health and Human Services Agency                                                                                      | General/Urban |                         |
| SfHIP 2022* [58]                   | San Francisco Framework for assessing population health and equity | US                       | San Francisco Health Improvement Partnership (SfHIP) (Gov/Acad)                                                                           | General/Urban | Equity                  |
| Shah 2017 [59]                     | Health Equity Framework                                            | US                       | Harris County Public Health, Texas (Gov)                                                                                                  | General/Urban | Equity                  |
| Stiefel 2012 [60]                  | Triple Aim                                                         | US                       | Institute for Healthcare Improvement (NPO)                                                                                                | General/Urban | Lifespan                |
| ten Asbroek 2004 [61]              | Dutch performance indicator framework                              | Netherlands              | Department of Social Medicine, Academic Medical Centre, University of Amsterdam; Dutch Ministry of Health, Welfare, and Sports (Gov/Acad) | General/Urban |                         |
| UK Department of Health 2022* [62] | Public Health Outcomes Framework                                   | UK                       | Department of Health (Gov)                                                                                                                | General/Urban | Lifespan                |
| Vila 2006 [63]                     | Wisconsin County Health Rankings                                   | US                       | University of Wisconsin Population Health Institute (Gov/Acad)                                                                            | General/Urban | Lifespan                |
| Webster 2013 [64]                  | Healthy Cities Indicators                                          | Europe                   | WHO European Healthy Cities Network (Inter-Gov)                                                                                           | General/Urban |                         |
| Wolfson 1994 [65]                  | Population Health Model (POHEM)                                    | Canada                   | Statistics Canada (Gov)                                                                                                                   | General/Urban | Lifespan                |

\*These are websites and the year is based on the date of access,

<sup>†</sup>not all frameworks explicitly mentioned a dimension.

Acad: academic, Gov: government, Inter-gov: inter-government, NGO: non-government organisation, NPO: non-profit organisation

<https://doi.org/10.1371/journal.pone.0278434.t002>

system performance within the context of other contextual determinants of health [46]. Within the construct of healthcare performance, common subdomains are accessibility, capacity, quality, patient-centeredness, cost and effectiveness [11, 16, 19, 24, 31, 32, 34, 39, 43, 46, 48, 51, 53, 54].

A few of the frameworks had specific focuses and therefore unique domains and indicators that are relevant largely for their setting. For example, the reporting framework for indigenous adolescents in Australia contained domains that were largely relevant for that community, such as ‘family, kinship and community health’, which explored family roles and responsibilities, contact with extended family, removal from family, participation in community events and sense of belonging to the community [12]. Another example is the Ghana’s Holistic Assessment Tool, which contains indicators for health-related United Nations sustainable development goals (SDGs) such as proportion of deliveries attended by a trained health

worker, proportion of children under 5 years sleeping under insecticide treated net, and tuberculosis treatment success rate, and certain endemic communicable diseases such as non-acute flaccid paralysis polio rate [42].

### Approach to framework development

Evans and Stoddart developed a population health framework in 1990 [20] based on a much earlier 1974 Whitepaper titled “A new perspective on the health of Canadians”, which recognized the limitations of the healthcare system on improving health status and presented a preliminary framework of the ‘health field’ [68]. Subsequent frameworks were mostly developed from one or a combination of four approaches: 1) adaptation from an existing framework [11, 12, 33, 45, 46, 48–51, 56, 58–60, 63, 65], 2) environmental scan of existing frameworks and literature review to summarize current knowledge of health determinants [7, 14, 16–20, 24, 25, 29, 32, 36, 37, 44, 48, 52, 57, 61, 63], 3) consulting and getting inputs from experts and stakeholders [12, 17, 19, 24, 26–29, 35, 39, 41, 48, 52–55, 62, 63] and 4) basing on past work (e.g. primary data collection, drawing on secondary data, past population health efforts, etc), priorities and goals of the organization developing it [7, 11, 21, 38, 61, 64, 67].

### Discussion

Population health has been a popular concept in healthcare for the past 3 decades but interestingly does not have a unanimous definition [1, 2, 69]. The most commonly used definition, which originated from Kindig and Stoddart, defines population health as ‘the health outcomes of a group of individuals, including the distribution of such outcomes within the group’ [1]. Nevertheless, people working on ‘population health’ would have different focuses, goals and populations of interest [69]. This may explain the large number of population health frameworks we found in this review.

Population health has its roots from recognition of health disparities by socioeconomic factors from as early as the 18<sup>th</sup> century to early epidemiological studies that informed public health measures, particularly in Britain and France, and finally to a renewed interest in the last 2 decades due to a range of health problems facing the world [70]. Development of the population health approach in Canada, driven by the government and healthcare leaders, began in the 1970s [71]. Improving population health was motivated by the articulation of the Triple Aims as a goal for the US healthcare system in the late 2000s [72]. It is therefore unsurprising that most of the frameworks originate from US, Europe and Canada. Even with purposive searching of organizations in the Southern hemisphere such as Australia and New Zealand, the results were still dominated by the Northern hemisphere, reflecting the state of development of population health in the world. Similarly, the lack of frameworks from Asia might be because much of the work done in improving the health of populations is ‘public health’ rather than ‘population health’.

Health status and social determinants of health were the most common domains across the frameworks. As seen from the word cloud, there were also many other domains that were closely related to and/or could be considered subdomains of one of these domains. This is because different frameworks have different level of detail, and the hierarchy of domains and subdomains are different in level of detail across frameworks. In other words, a subdomain in one framework could be a domain in another, or an indicator in one framework could be a subdomain in another. It is therefore also difficult to summarize domains and subdomains in a simple way across the frameworks.

The domains and subdomains chosen in different frameworks largely reflects the purpose, information needs of varying stakeholders, and the focus of the organization(s) developing

them. It is unsurprising to see that some key domains appear in many frameworks, and domains are branched out to varying degrees in different frameworks. For example, social determinants of health features in all frameworks except 7 frameworks [16, 34, 42, 50, 52, 54, 60]. Some frameworks have a heavy focus on health status, such as the Healthy Montgomery Core Measures Set, Triple Aim, Euro-REVES 2 and Ohio health priorities, with the Euro-REVES 2 framework even measuring activities of daily living and degree of functional limitations [26, 27, 50, 60]. Other frameworks break down the social determinants into considerable detail, such as the framework for community contextual characteristics, life course health development framework, Healthy Cities Indicators, and others [12, 22, 23, 26, 29, 38, 49, 53, 55, 56, 59, 63, 64, 67]. Several have a heavier focus on healthcare performance, such as the EU Joint Assessment Framework, European Community Health Indicators (ECHI), OECD, the Primary Healthcare Performance Initiative (PHCPI), National scorecard for the US health system and the Ireland HSPA framework [19, 34, 39, 46, 48, 54]. Others are generally more balanced between the domains.

It is also noteworthy that almost half of the frameworks did not have any indicators and these tended to be older frameworks. About 61% of frameworks developed in 2010 and before did not have indicators while the converse is true for those developed after 2010. There was likely stronger focus on understanding the range of factors affecting population health and identifying priorities for improving population health in the earlier period. As organizations started to implement population health management strategies, measurement of population health started to feature more and more recent frameworks tended to include specific indicators. The inclusion of specific indicators also implies the ability to measure them, and therefore the availability of health information systems for data collection. These have generally become more well developed in the recent decade or so, also explaining why more recent frameworks have indicators. Nevertheless, frameworks without indicators can still offer a theoretical basis for selecting indicators that are relevant and feasible for a given setting.

The results of this scoping review can serve as an evidence base for governments and/or health systems developing their own population health frameworks and selecting indicators for their population health initiatives. They can select and adapt from the frameworks available, and assess the relevance of the range of domains, subdomains and indicators in their context. Populations are largely unique as they are shaped by their local and wider contextual factors. As such, no one framework used in one population or healthcare system is likely directly applicable to another population or healthcare system without adaptation. Population health practitioners can derive any level of detail that matches their interests and requirements from this review, from a broad sense of the literature down to specific indicators. The range of subdomains and indicators could also be sources of new hypotheses in a given region or jurisdiction for the purposes of population health research.

Settings which are further ahead in the population health journey with existing indicators can also use these results to assess what domains and subdomains have been covered, and where the gaps are. For example, population health is an increasingly important national priority in Singapore and the Ministry of Health is planning several major initiatives to improve the health of the general population [73, 74]. To achieve this, the Ministry is working closely with the three major public healthcare clusters in Singapore to develop a set of population health indicators and the evidence base here can help inform the choices. With an initial set of indicators, practitioners can also interrogate their data systems and medical records to determine if they are available or if they need to build prospective data collection tools. This can also be an iterative process for selecting indicators using the results here as a resource. One constraint of the data in its current form though is the difficulty in navigating the long list of domains,

subdomains and indicators. In future work, we aim to design a dashboard that allows for interactive exploration of the scoping review data.

There are limitations to this scoping review. Firstly, some frameworks might have been missed due to our language restriction, especially those in Asia. However, many official documents from this region are available in English, so this might not have impacted the search results significantly. Secondly, there are many terms and concepts in the literature that have overlaps with population health, such as public health, urban health, global health, population health management, health equity, health system performance and social determinants of health. Based on our inclusion criteria, concepts like urban health, rural health, community health and global health would be included as they pertain to general populations albeit in different types of settings. Related concepts such as health equity, social determinants of health and health system performance were not the focus of the search and could be part of the frameworks included. However, if a framework was focused on one of these concepts alone without the measurement of health status, then it would be excluded. Some frameworks also focused more on population health management and if it looked more like a logic model for specific interventions then these would also be excluded [75, 76]. Overall, this review represents a useful collection of frameworks used for measuring the health of a population and its key antecedents [60].

## Conclusion

We found 57 frameworks for the measurement of population health with variable numbers of domains, subdomains and indicators, and depth of detail. The key domains apart from health status were social determinants of health, health behaviours and healthcare system performance. These results serve as a useful resource for governments and healthcare organizations for informing their population health measurement efforts. Specifically, when developing their own population health framework and/or selection of population health indicators, they can identify common domains and subdomains that other organizations include, as well as consider others more systematically for relevance in their context.

## Supporting information

### **S1 File. PRISMA-ScR checklist.**

(DOCX)

### **S2 File. Search strategy.**

(DOCX)

**S3 File. Domains, subdomains and indicators.** This file contains the full list of domains, subdomains and indicators from the 57 included population health frameworks.

(XLSX)

**S1 Fig. Heatmap of number of domains, subdomains and indicators.** L2: level 2, L3: level 3, This is a visualization of the numbers of domains, subdomains and indicators in each framework in both figures and shading. Blank cells represent absence of the corresponding subdomain and/or indicators.

(DOCX)

**S2 Fig. Wordcloud for framework domains.** Level 1 domains in all frameworks were clustered by concept using a combination of hierarchical clustering and manual edit. The sizes of the concepts are proportional to the number of domains in each concept.

(DOCX)

**S3 Fig. Wordcloud for framework domains by year of publication.** Level 1 domains in all frameworks were clustered by concept using a combination of hierarchical clustering and manual edit. The sizes of the concepts are proportional to the number of domains in each concept. The concepts are presented by decade when the frameworks were published. A: Before 2000, B: 2001 to 2010, C: 2011 to 2020, D: After 2020. (DOCX)

## Acknowledgments

We would like to thank Ms Sabrina Liau for her assistance with article screening.

## Author Contributions

**Conceptualization:** Sean Shao Wei Lam, Choon How How.

**Data curation:** Sze Ling Chan, Clement Zhong Hao Ho, Nang Ei Ei Khaing, Ezra Ho, Candelyn Pong.

**Formal analysis:** Sze Ling Chan, Jia Sheng Guan.

**Investigation:** Clement Zhong Hao Ho, Nang Ei Ei Khaing, Ezra Ho, Candelyn Pong, Calida Chua, Zongbin Li, Trudi Lim.

**Methodology:** Sze Ling Chan, Clement Zhong Hao Ho, Nang Ei Ei Khaing, Ezra Ho, Jia Sheng Guan.

**Project administration:** Sze Ling Chan, Clement Zhong Hao Ho, Sean Shao Wei Lam.

**Resources:** Sean Shao Wei Lam, Choon How How.

**Supervision:** Sze Ling Chan, Choon How How.

**Validation:** Sze Ling Chan, Clement Zhong Hao Ho, Ezra Ho, Candelyn Pong, Jia Sheng Guan.

**Visualization:** Sze Ling Chan, Jia Sheng Guan.

**Writing – original draft:** Sze Ling Chan.

**Writing – review & editing:** Sze Ling Chan, Clement Zhong Hao Ho, Nang Ei Ei Khaing, Ezra Ho, Candelyn Pong, Jia Sheng Guan, Calida Chua, Zongbin Li, Trudi Lim, Sean Shao Wei Lam, Lian Leng Low, Choon How How.

## References

1. Kindig DA, Stoddart G. What is population health? *Am J Public Health*. 2003 Mar 1; 93(3):380–3. <https://doi.org/10.2105/ajph.93.3.380> PMID: 12604476
2. Arah OA. On the relationship between individual and population health. *Med Health Care Philos*. 2009; 12(3):235. <https://doi.org/10.1007/s11019-008-9173-8> PMID: 19107577
3. Valles SA. *Philosophy of Population Health*. Gronfeldt R, editor. New York: Routledge; 2018.
4. McDowell I, Spasoff RA, Kristjansson B. On the classification of population health measurements. *Am J Public Health*. 2004; 94(3):388–93. <https://doi.org/10.2105/ajph.94.3.388> PMID: 14998801
5. Ashraf K, Ng CJ, Teo CH, Goh KL. Population indices measuring health outcomes: A scoping review. *J Glob Health*. 2019; 9(1). <https://doi.org/10.7189/jogh.09.010405> PMID: 30701069
6. Nilsen P. Making sense of implementation theories, models and frameworks. *Implement Sci*. 2015 Apr 21; 10:53. <https://doi.org/10.1186/s13012-015-0242-0> PMID: 25895742
7. Etches V, Frank J, di Ruggiero E, Manuel D. Measuring population health: a review of indicators. *Annu Rev Public Health*. 2006; 27:29–55. <https://doi.org/10.1146/annurev.publhealth.27.021405.102141> PMID: 16533108

8. Kaltenthaler E, Maheswaran R, Beverley C. Population-based health indexes: A systematic review. *Health Policy (New York)*. 2004; 68(2):245–55. <https://doi.org/10.1016/j.healthpol.2003.10.005> PMID: 15063023
9. Tricco AC, Lillie E, Zarin W, O'Brien KK, Colquhoun H, Levac D, et al. PRISMA Extension for Scoping Reviews (PRISMA-ScR): Checklist and Explanation. *Ann Intern Med*. 2018 Sep 4; 169(7):467–73. <https://doi.org/10.7326/M18-0850> PMID: 30178033
10. Haddaway NR, Page MJ, Pritchard CC, McGuinness LA. PRISMA2020: An R package and Shiny app for producing PRISMA 2020-compliant flow diagrams, with interactivity for optimised digital transparency and Open Synthesis. *Campbell Systematic Reviews*. 2022 Jun 27; 18(2). <https://doi.org/10.1002/cl2.1230> PMID: 36911350
11. Arah OA, Westert GP. Correlates of health and healthcare performance: applying the Canadian health indicators framework at the provincial-territorial level. *BMC Health Serv Res*. 2005 Dec 1; 5:76. <https://doi.org/10.1186/1472-6963-5-76> PMID: 16321155
12. Azzopardi PS, Sawyer SM, Carlin JB, Degenhardt L, Brown N, Brown AD, et al. Health and wellbeing of Indigenous adolescents in Australia: a systematic synthesis of population data. *Lancet*. 2018 Feb 24; 391(10122):766–82. [https://doi.org/10.1016/S0140-6736\(17\)32141-4](https://doi.org/10.1016/S0140-6736(17)32141-4) PMID: 29146122
13. Beard JR, Tomaska N, Earnest A, Summerhayes R, Morgan G. Influence of socioeconomic and cultural factors on rural health. *Aust J Rural Health*. 2009; 17(1):10–5. <https://doi.org/10.1111/j.1440-1584.2008.01030.x> PMID: 19161494
14. Casebeer A, Deis K, Doze S. Health indicator development in Alberta health authorities: searching for common ground. *Can J Public Health*. 1999; 90 Suppl 1(Suppl 1). <https://doi.org/10.1007/BF03403582> PMID: 10686763
15. U.S. Centers for Disease Control and Prevention. *Community Health Assessment for Population Health Improvement: Resource of Most Frequently Recommended Health Outcomes and Determinants*. Atlanta, GA, USA; 2013.
16. Canterbury Health System. System level measures improvement plan 2021–2022 [Internet]. 2021. <https://www.cdhb.health.nz/wp-content/uploads/ed30b6b8-canterbury-system-level-measures-improvement-plan-2021-2022.pdf>
17. Canadian Institute for Health Information. *A Performance Measurement Framework for the Canadian Health System* [Internet]. 2013. [https://secure.cihi.ca/free\\_products/HSP\\_Framework\\_Technical\\_Report\\_EN.pdf](https://secure.cihi.ca/free_products/HSP_Framework_Technical_Report_EN.pdf)
18. Emery RT, Zhang K, Goodman D, Dev A, Lewinson T, Wolff K, et al. Inclusion of Social and Structural Determinants of Health to Advance Understanding of their Influence on the Biology of Chronic Disease. *Curr Protoc*. 2022 Oct 6; 2(10). <https://doi.org/10.1002/cpz1.556> PMID: 36200800
19. European Commission. *Towards a Joint Assessment Framework in the Area of Health. Work in progress: 2015 update* [Internet]. 2015. <https://ec.europa.eu/social/BlobServlet?docId=17033&langId=en>
20. Evans RG, Stoddart GL. Producing health, consuming health care. *Soc Sci Med*. 1990; 31(12):1347–63. [https://doi.org/10.1016/0277-9536\(90\)90074-3](https://doi.org/10.1016/0277-9536(90)90074-3) PMID: 2126895
21. Galea S, Freudenberg N, Vlahov D. Cities and population health. *Soc Sci Med*. 2005 Mar; 60(5):1017–33. <https://doi.org/10.1016/j.socscimed.2004.06.036> PMID: 15589671
22. Halfon N, Hochstein M. Life course health development: an integrated framework for developing health, policy, and research. *Milbank Q*. 2002; 80(3):433–79. <https://doi.org/10.1111/1468-0009.00019> PMID: 12233246
23. Hancock T, Labonte R, Edwards R. Indicators that count! Measuring population health at the community level. *Can J Public Health*. 1999; 90 Suppl 1(Suppl 1). <https://doi.org/10.1007/BF03403574> PMID: 10686755
24. Hatem E, Lasser EC, Kharrazi HHK, Perman C, Montgomery R, Weiner JP. A Population Health Measurement Framework: Evidence-Based Metrics for Assessing Community-Level Population Health in the Global Budget Context. *Popul Health Manag*. 2018 Aug 1; 21(4):261–70. <https://doi.org/10.1089/pop.2017.0112> PMID: 29035630
25. Canada H. *Strategies for Population Health—Investing in the Health of Canadians* [Internet]. Ottawa; 1994. [https://publications.gc.ca/collections/collection\\_2016/sc-hc/H39-316-1994-eng.pdf](https://publications.gc.ca/collections/collection_2016/sc-hc/H39-316-1994-eng.pdf)
26. Health Policy Institute of Ohio. *Improving Population Health Planning in Ohio* [Internet]. 2016. [https://regroup-production.s3.amazonaws.com/documents/ReviewReference/699737076/Improving population health planning in Ohio.pdf?response-content-type=application%2Fpdf&X-Amz-Algorithm=AWS4-HMAC-SHA256&X-Amz-Credential=AKIAYSFKCAWYQ4D5IUHG%2F20230703%2Fus](https://regroup-production.s3.amazonaws.com/documents/ReviewReference/699737076/Improving%20population%20health%20planning%20in%20Ohio.pdf?response-content-type=application%2Fpdf&X-Amz-Algorithm=AWS4-HMAC-SHA256&X-Amz-Credential=AKIAYSFKCAWYQ4D5IUHG%2F20230703%2Fus)
27. Healthy Montgomery. *HEALTHY MONTGOMERY 2016 COMMUNITY HEALTH NEEDS ASSESSMENT*. 2016; [https://www.montgomerycountymd.gov/healthymontgomery/Resources/Files/Reports/2016\\_HM\\_CHNA\\_Final\\_June\\_2\\_2016.pdf](https://www.montgomerycountymd.gov/healthymontgomery/Resources/Files/Reports/2016_HM_CHNA_Final_June_2_2016.pdf)

28. Government of Ireland. Healthy Ireland Outcomes Framework [Internet]. 2019. <https://assets.gov.ie/7626/cb95e0dbb01e4a9fb7ce7affd609507e.pdf>
29. Hillemeier MM, Lynch J, Harper S, Casper M. Measuring contextual characteristics for community health. *Health Serv Res*. 2003; 38(6 Pt 2):1645–717. <https://doi.org/10.1111/j.1475-6773.2003.00198.x> PMID: 14727793
30. Hood CM, Gennuso KP, Swain GR, Catlin BB. County Health Rankings: Relationships Between Determinant Factors and Health Outcomes. *Am J Prev Med*. 2016 Feb 1; 50(2):129–35. <https://doi.org/10.1016/j.amepre.2015.08.024> PMID: 26526164
31. Inf-Act. A Distributed Infrastructure on Population Health (DIPoH) [Internet]. 2020. <https://www.inf-act.eu/sites/inf-act.eu/files/2020-01/Booklet.pdf>
32. Institute of Medicine (IOM). State of the USA Health Indicators: Letter Report. State of the USA Health Indicators. 2009 Jan 1;
33. IOM (Institute of Medicine). Toward quality measures for population health and the leading health indicators. [Internet]. Washington, DC; 2012. [https://www.ncbi.nlm.nih.gov/books/NBK202180/pdf/Bookshelf\\_NBK202180.pdf](https://www.ncbi.nlm.nih.gov/books/NBK202180/pdf/Bookshelf_NBK202180.pdf)
34. Ireland Department of Health. Health System Performance (HSPA) Framework [Internet]. 2021 [cited 2023 Jul 3]. <https://www.gov.ie/en/publication/6660a-health-system-performance-assessment-hspa-framework/#>
35. Jeffery B, Abonyl S, Labonte R, Duncan K. Engaging Numbers: Developing Health Indicators that Matter for First Nations and Inuit People. *Int J Indig Health*. 2006; 3(1):44–52.
36. Juarez PD, Matthews-Juarez P, Hood DB, Im W, Levine RS, Kilbourne BJ, et al. The public health exposure: a population-based, exposure science approach to health disparities research. *Int J Environ Res Public Health*. 2014; 11(12):12866–95. <https://doi.org/10.3390/ijerph111212866> PMID: 25514145
37. Kassler WJ, Howerton M, Thompson A, Cope E, Alley DE, Sanghavi D. Population Health Measurement at Centers for Medicare & Medicaid Services: Bridging the Gap Between Public Health and Clinical Quality. *Popul Health Manag*. 2017 Jun 1; 20(3):173–80.
38. Kim D, Saada A. The social determinants of infant mortality and birth outcomes in Western developed nations: a cross-country systematic review. *Int J Environ Res Public Health*. 2013; 10(6):2296–335. <https://doi.org/10.3390/ijerph10062296> PMID: 23739649
39. Kramers PGN. The ECHI project: health indicators for the European Community. *Eur J Public Health*. 2003 Sep 1; 13(3 Suppl):101–6. [https://doi.org/10.1093/eurpub/13.suppl\\_1.101](https://doi.org/10.1093/eurpub/13.suppl_1.101) PMID: 14533758
40. Krewski D, Hogan V, Turner MC, Zeman PL, McDowell I, Edwards N, et al. An Integrated Framework for Risk Management and Population Health. 2007 Nov; 13(6):1288–312.
41. Kuehnert P, Fawcett J, Depriest K, Chinn P, Cousin L, Ervin N, et al. Defining the social determinants of health for nursing action to achieve health equity: A consensus paper from the American academy of nursing ARTICLE IN PRESS. *Nurs Outlook*. 2021;
42. Kumah E, Ankomah SE, Fusheini A, Sarpong EK, Anyimadu E, Quist A, et al. Frameworks for health systems performance assessment: how comprehensive is Ghana's holistic assessment tool? *Glob Health Res Policy*. 2020 Dec 1; 5(1):1–12. <https://doi.org/10.1186/s41256-020-00139-2> PMID: 32166129
43. Los Angeles County Department of Public Health. Key Indicators of Health by Service Planning Area [Internet]. 2017. [http://publichealth.lacounty.gov/ha/docs/2015LACHS/KeyIndicator/PH-KIH\\_2017-secUPDATED.pdf](http://publichealth.lacounty.gov/ha/docs/2015LACHS/KeyIndicator/PH-KIH_2017-secUPDATED.pdf)
44. Levene LS, Bankart J, Walker N, Wilson A, Baker R. How health care may modify the effects of illness determinants on population outcomes: the Leicester SEARCH conceptual framework for primary care. 2018;
45. National Quality Forum. Finding Common Ground for Healthcare Priorities: Families of Measures for Assessing Affordability, Population Health, and Person- and Family-Centered Care [Internet]. 2014. <https://www.qualityforum.org/WorkArea/linkit.aspx?LinkIdentifier=id&ItemID=77001>
46. OECD. Health at a Glance 2021: OECD Indicators. Paris: OECD Publishing; 2021.
47. Oleske DM. An Epidemiologic Framework for the Delivery of Health Care Services. *Epidemiology and the Delivery of Health Care Services*. 2009;3–30.
48. Primary Health Care Performance Initiative. The PHCPI Conceptual Framework [Internet]. 2018 [cited 2022 Jul 15]. <https://improvingphc.org/phcpi-conceptual-framework>
49. Health England P. Addressing health inequalities through collaborative action: briefing note.
50. Robine J, Jagger C, Romieu I. Selection of a Coherent Set of Health Indicators for the European Union. Phase II: Final report [Internet]. 2002. [https://reves.site.ined.fr/fichier/s\\_rubrique/20027/userguide2.en.pdf](https://reves.site.ined.fr/fichier/s_rubrique/20027/userguide2.en.pdf)



51. Roos NP, Black CD, Frohlich N, Decoster C, Cohen MM, Tataryn DJ, et al. A population-based health information system. *Med Care*. 1995; 33(12 Suppl):DS13–20. <https://doi.org/10.1097/00005650-199512001-00005> PMID: 7500666
52. Sadana R, Tandon A, Murray CJ, Serdobova I, Cao Y, Xie WJ, et al. Describing population health in six domains: comparable results from 66 household surveys. 2002.
53. Santana P, Freitas Â, Stefanik I, Costa C, Oliveira M, Rodrigues TC, et al. Advancing tools to promote health equity across European Union regions: the EURO-HEALTHY project. *Health Res Policy Syst*. 2020 Feb 13; 18(1). <https://doi.org/10.1186/s12961-020-0526-y> PMID: 32054540
54. Schoen C, Davis K, How SKH, Schoenbaum SC. U.S. health system performance: a national scorecard. *Health Aff (Millwood)*. 2006 Nov; 25(6). <https://doi.org/10.1377/hlthaff.25.w457> PMID: 16987933
55. Schoon PM, Krumwiede K. A holistic health determinants model for public health nursing education and practice. *Public Health Nurs*. 2022 Sep 24; 39(5):1070–7. <https://doi.org/10.1111/phn.13063> PMID: 35201627
56. Schulz A, Northridge ME. Social determinants of health: implications for environmental health promotion. *Health Educ Behav*. 2004 Aug; 31(4):455–71. <https://doi.org/10.1177/1090198104265598> PMID: 15296629
57. County of San Diego Health and Human Services Agency. Equity Framework [Internet]. 2020. [https://regroup-production.s3.amazonaws.com/documents/ReviewReference/699737125/EquityFrameworkOverview\\_FINAL.pdf?response-content-type=application%252Fpdf&X-Amz-Algorithm=AWS4-HMAC-SHA256&X-Amz-Credential=AKIAYSFKAWYQ4D5IUHG%252F20230703%252Fus-east-1%252Fs3%25](https://regroup-production.s3.amazonaws.com/documents/ReviewReference/699737125/EquityFrameworkOverview_FINAL.pdf?response-content-type=application%252Fpdf&X-Amz-Algorithm=AWS4-HMAC-SHA256&X-Amz-Credential=AKIAYSFKAWYQ4D5IUHG%252F20230703%252Fus-east-1%252Fs3%25)
58. SfHIP. San Francisco Framework for Assessing Population Health and Equity [Internet]. [cited 2022 May 27]. <http://www.sfhip.org/chna/community-health-data/san-francisco-framework-for-assessing-population-health-and-equity/>
59. Shah UA, Hadayia JM, Forys LE. From Principles to Practice: One Local Health Department's Journey Toward Health Equity. *Health Equity*. 2017 Aug 1; 1(1):23–7. <https://doi.org/10.1089/heq.2016.0004> PMID: 30283832
60. Stiefel M, Nolan K. A Guide to Measuring the Triple Aim: Population Health, Experience of Care, and Per Capita Cost. IHI Innovation Series white paper [Internet]. 2012. <https://www.ihl.org/resources/Pages/IHIWhitePapers/AGuidetoMeasuringTripleAim.aspx>
61. ten Asbroek AHA, Arah OA, Geelhoed J, Custers T, Delnoij DM, Klazinga NS. Developing a national performance indicator framework for the Dutch health system. *Int J Qual Health Care*. 2004; 16 Suppl 1 (SUPPL. 1). <https://doi.org/10.1093/intqhc/mzh020> PMID: 15059989
62. UK Department of Health. Public Health Outcomes Framework [Internet]. [cited 2022 Jul 12]. <https://fingertips.phe.org.uk/profile/public-health-outcomes-framework>
63. Vila PM, Angela Kempf BM, Bridget Booske MC, Athens JK, Patrick Remington ML. 2006 Wisconsin County Health Rankings Full Report. 2006; [https://uwphi.pophealth.wisc.edu/wp-content/uploads/sites/316/2017/11/WCHR\\_2006\\_FullReport.pdf](https://uwphi.pophealth.wisc.edu/wp-content/uploads/sites/316/2017/11/WCHR_2006_FullReport.pdf)
64. Webster P, Sanderson D. Healthy Cities indicators—a suitable instrument to measure health? *J Urban Health*. 2013 Oct; 90 Suppl 1 (Suppl 1):52–61. <https://doi.org/10.1007/s11524-011-9643-9> PMID: 22527812
65. Wolfson M. POHEM—a framework for understanding and modelling the health of human populations. *World Health Stat Q*. 1994; 47(3–4):157–76. PMID: 7740830
66. Solar O, Irwin A. A conceptual framework for action on the social determinants of health. *Social Determinants of Health Discussion Paper 2 (Policy and Practice)*. 2010.
67. Institute for People, Place, & Possibility. How the Vital Conditions Framework and IP3 ASSESS Support West Virginia Communities [Internet]. 2017 [cited 2023 Jul 3]. <https://www.i-p3.org/post/how-the-vital-conditions-framework-and-ip3-assess-support-west-virginia-communities>
68. Lalonde M. A new perspective on the health of Canadians [Internet]. 1974. <http://www.phac-aspc.gc.ca/ph-sp/pdf/perspect-eng.pdf>
69. Peek CJ, Westfall JM, Stange KC, Liaw W, Ewigman B, Devoe JE, et al. Shared language for shared work in population health. *Ann Fam Med*. 2021 Sep 1; 19(5):450–6. <https://doi.org/10.1370/afm.2708> PMID: 34546952
70. Szreter S. The population health approach in historical perspective. *Am J Public Health*. 2003 Mar; 93(3):421–31. <https://doi.org/10.2105/ajph.93.3.421> PMID: 12604486
71. Cohen D, Huynh T, Sebold A, Harvey J, Neudorf C, Brown A. The population health approach: A qualitative study of conceptual and operational definitions for leaders in Canadian healthcare. *SAGE Open Med*. 2014; 2:2050312114522618. <https://doi.org/10.1177/2050312114522618> PMID: 26770704

72. Berwick DM, Nolan TW, Whittington J. The Triple Aim: Care, Health, And Cost. 2017 Aug 2; 27(3):759–69.
73. Ministry of Health Singapore. Promoting overall healthier living while targeting specific sub-populations [Internet]. 2022 [cited 2022 Aug 29]. <https://www.moh.gov.sg/news-highlights/details/promoting-overall-healthier-living-while-targeting-specific-sub-populations>
74. Ministry of Health Singapore. Healthier you, with Healthier SG [Internet]. 2022 [cited 2022 Aug 29]. <https://www.healthiersg.gov.sg/>
75. Reeve C, Humphreys J, Wakerman J. A comprehensive health service evaluation and monitoring framework. *Eval Program Plann*. 2015 Dec 1; 53:91–8. <https://doi.org/10.1016/j.evalprogplan.2015.08.006> PMID: 26343490
76. Loewenson R, Simpson S. Strengthening Integrated Care Through Population-Focused Primary Care Services: International Experiences Outside the United States. *Annu Rev Public Health*. 2017 Mar 20; 38:413–29. <https://doi.org/10.1146/annurev-publhealth-031816-044518> PMID: 28384084
